# Supplementary material
Source: PubMed Central journal article supplement (PMC3285364)
Supplement: supp_M111.290403_jbc.M111.290403-1.pdf [file supp_M111.290403_jbc.M111.290403-1.pdf]

## Supplemental Data

Table S1. Oligonucleotides used for qPCR analysis.

Primers for ChIP-qPCR analysis;

---

T1; F: 5'-CGGCTGCCTGTCAGAGCGCTAC-3', R: 5'-AACTAGATTGCTGGGAGATCTTCC-3'  
T2; F: 5'-TCCTAAGCACGCCAGCCTATTCTG-3', R: 5'-CACACCGAGAGAACGATCCAATTC-3'  
T3; F: 5'-CCTCGCTGTGCCTCTGGTAGGCC-3', R: 5'-CCTGGCCTCTGCTCGAGCCA-3'  
S1; F: 5'-TACTCACCTCGGGCCAGATCCAAG-3', R: 5'-CTCTCCAGAATGCCAGACAGATAG-3'  
S2; F: 5'-GAGCCGTGTCCCAATTAGCTTCAG-3', R: 5'-CAGAATAGGCTGGCGTGCTTAGGA-3'  
S3; F: 5'-GTGCAGAGGACCTCTGGATTTGGC-3', R: 5'-CTTAGGCAAGCGACTAGACCTCTC-3'  
S4; F: 5'-TCCCAGTCTCTCTGAGTAAGGAAG-3', R: 5'-TGAGTCTGCTGCCTCAACCTCAGC-3'  
P21-S; F: 5'-TCTGAGGTGAGGCCTCCTTC-3', R: 5'-ATCCATGAGCTTCAGGCCTC-3'  
Actin; F: 5'-AGGATCACTCAGAACGGACACCAT-3', R: 5'-TACACGCTAGGCGTAAAGTTGGCT-3'

Primers for qRT-PCR analysis;

---

Sox2; F: 5'-CACCATGGCGACCGGGCGGCAACCAG-3', R: 5'-TCAAAGCGTGTACTTATCCTTCTTC-3'  
Sox3; F: 5'-AGCGCCTGGACACGTACAC-3', R: 5'-ATGTCGTAGCGGTGCATCT-3'  
TLX (total); F: 5'-GCGTGTGACTGAAGAAGTG-3', R: 5'-AGCCAGGCTCACGAGAGTC-3'  
TLX (endogenous); F: 5'-AATCCAGTGACATCTAA-3', R: 5'-TCGAGTTCTGAAGGCTGCAG-3'  
p21; F: 5'-CGAGAACGGTGGAACTTTGAC-3', R: 5'-CAGGGCTCAGGTAGACCTTG-3'  
Gadd45g; F: 5'-GGGAAAGCACTGCACGAACT-3', R: 5'-AGCACGCAAAGGTCACATTG-3'  
BLBP; F: 5'-GGAAGCTGACAGACAGCCAGA-3', R: 5'-CGCCCAGAGCCTTCATGTAC-3'  
GFAP; F: 5'-ATCGAGATCGCCACCTACAG-3', R: 5'-CTCACATCACCACGTCCTTG-3'  
Nestin; F: 5'-GAGCCATTGTGGTCTACGGAAG-3', R: 5'-TCCCCTAACTCATCTGCCTCA-3'  
Musashi-1; F: TAGTTCGAGGGACAGGCTCT-3', R: GTTGAGGGACAGGCAGTAGC-3'  
GAPDH; F: 5'-AGGTCGGTGTGAACGGATTTG-3', R: 5'-TGTAGACCATGTAGTTGAGGTCA-3'

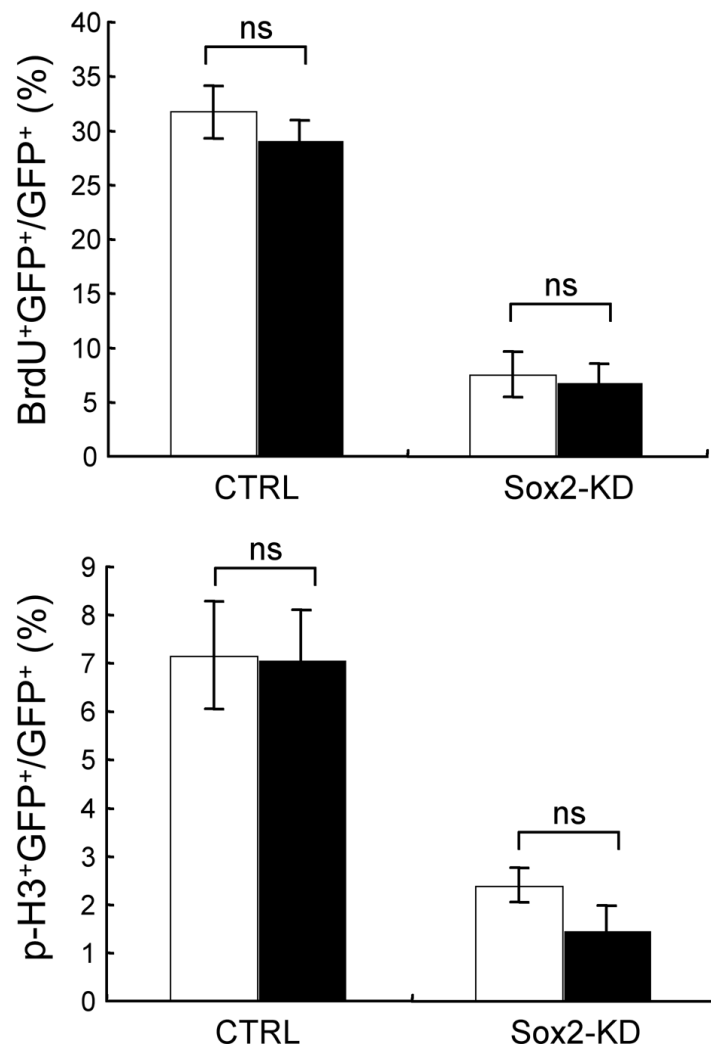

**FIGURE S1.**

Adult NSCs that had been infected with retrovirus for mock (white bars) or expressing TLX (black bars) were transfected with vectors for scramble sequence of shRNA (CTRL), or Sox2 shRNA (Sox2-KD). Cells were cultured for 2 days, and then treated with BrdU for 1 h. Cells were fixed with 4% paraformaldehyde, and stained with anti-EGFP and anti-BrdU, or anti-phospho-Histone H3 (Ser10) antibodies, and each positive cell was counted. The proportion of BrdU or phospho-Histone H3 and EGFP double positive cells among GFP positive cells is shown (%). Data are means  $\pm$ SEM of value from three independent immunostaining pictures. Error bars and *t*-test show the standard deviation (s.d.). ns; not significant.
